# Supplementary material for: Caffeine Consumption in Switzerland: Results from the First National Nutrition Survey MenuCH
Source: MDPI journal article supplement (doi:10.3390/nu12010028), 2019-12-20
Supplement: s1 [file s1]

# Supplementary Files

## Caffeine consumption in Switzerland: results from the first national nutrition survey menuCH

- Supplementary Figure S1.** Decision tree regarding food groups with or without caffeine.
- Supplementary Table S1.** Overview of caffeine concentration in foods, by food groups.
- Supplementary Table S2.** Measurements of caffeine concentration in coffee and soft drinks.
- Supplementary Table S3.** Daily caffeine consumption per kg of body weight.
- Supplementary Figure S2.** Main food groups sources of caffeine in mg/day.
- Supplementary Figure S3.** Distribution of caffeine consumption per hour during the day.
- Supplementary Table S4.** Daily caffeine consumption in the population aged 18-64 years old.

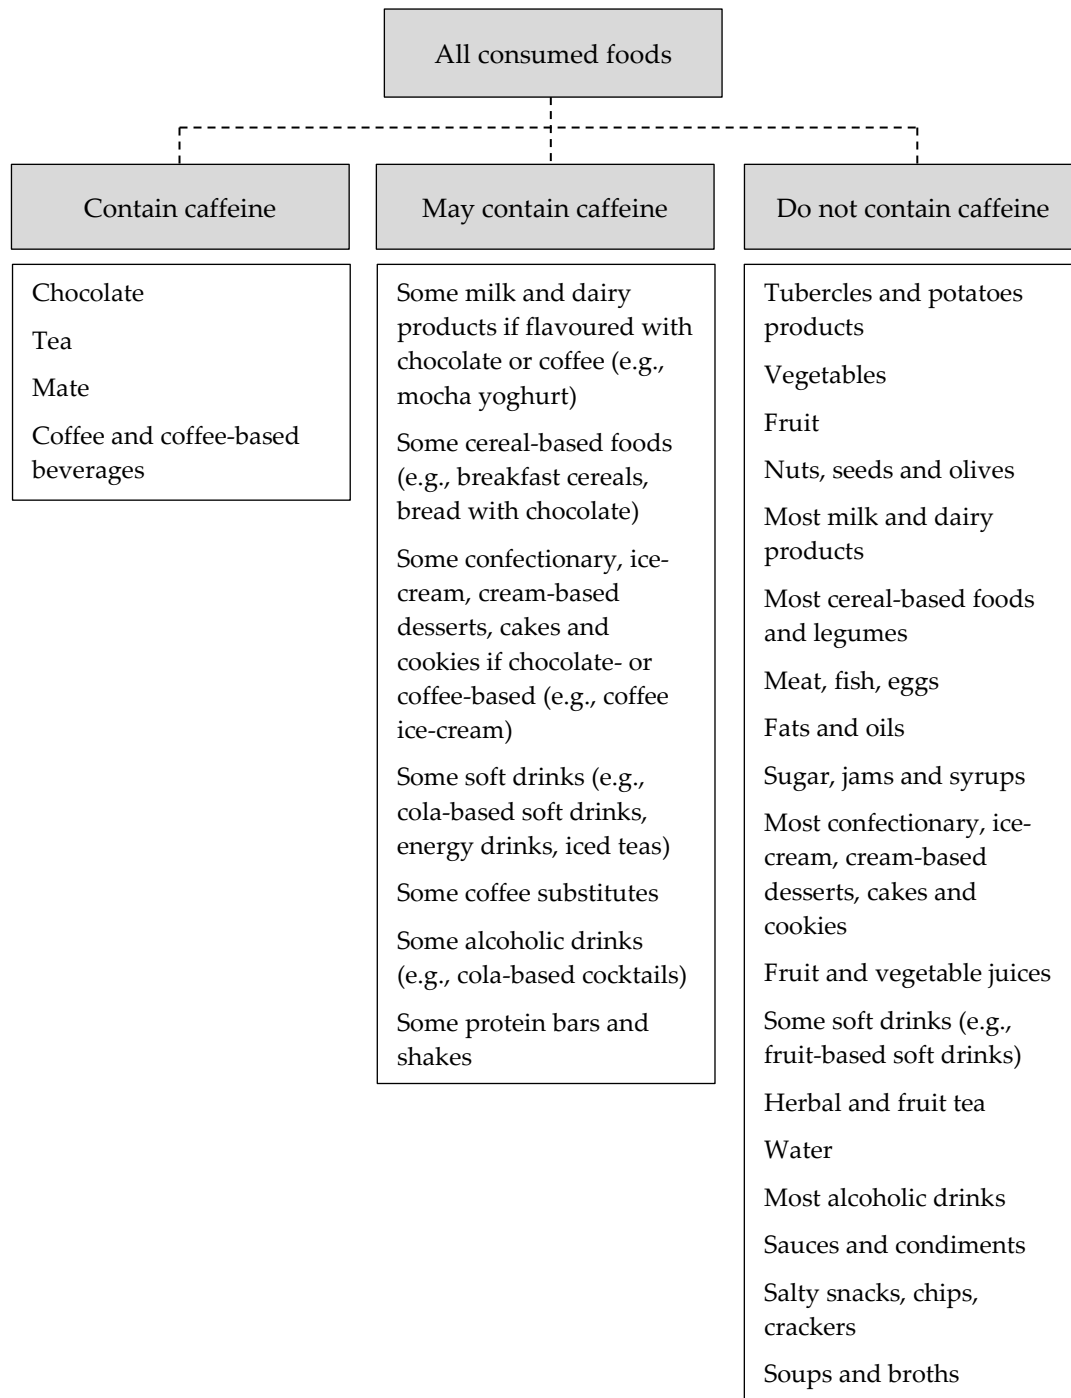

**Supplementary Figure S1.** Decision tree regarding food groups with or without caffeine.

**Supplementary Table S1.** Overview of caffeine concentration in foods, by food groups.

| Food Group                                                                                                 | Decision                                                                                                                                                                                                                                                                                                                                                                                                                                                                                                                                                                                                                                                                                                                                                                                                      | Contain caffeine |
|------------------------------------------------------------------------------------------------------------|---------------------------------------------------------------------------------------------------------------------------------------------------------------------------------------------------------------------------------------------------------------------------------------------------------------------------------------------------------------------------------------------------------------------------------------------------------------------------------------------------------------------------------------------------------------------------------------------------------------------------------------------------------------------------------------------------------------------------------------------------------------------------------------------------------------|------------------|
| <b>Tubercles and potatoes products</b>                                                                     | Do not contain caffeine.                                                                                                                                                                                                                                                                                                                                                                                                                                                                                                                                                                                                                                                                                                                                                                                      | No               |
| <b>Vegetables</b>                                                                                          | Do not contain caffeine.                                                                                                                                                                                                                                                                                                                                                                                                                                                                                                                                                                                                                                                                                                                                                                                      | No               |
| <b>Fruit</b>                                                                                               | Even though the seeds and nuts of some fruits such as coffee, cocoa, cola and guarana contain caffeine, fruit pulp as generally consumed does not contain caffeine.                                                                                                                                                                                                                                                                                                                                                                                                                                                                                                                                                                                                                                           | No               |
| <b>Nuts, seeds and olives</b>                                                                              | Cocoa seeds, coffee seeds, kola nuts and guarana seeds are not consumed per se, so this food group does not contain caffeine.                                                                                                                                                                                                                                                                                                                                                                                                                                                                                                                                                                                                                                                                                 | No               |
| <b>Milk and dairy products</b>                                                                             | Milk and dairy products do not naturally contain caffeine, but some may contain caffeine according to their flavour (chocolate, dark chocolate, milk chocolate, stracciatella, coffee/mocha). Concentrations were estimated using standard recipes, standard compositions and reference values from the American and Canadian food composition databases.                                                                                                                                                                                                                                                                                                                                                                                                                                                     | Maybe            |
| <b>Cereals and legumes</b><br><i>Flour, pasta, rice, bread, rusks, cereals, breakfast cereals, legumes</i> | Cereal-based foods and legumes do not naturally contain caffeine, but some may contain caffeine according to their flavour (chocolate, dark chocolate, milk chocolate). In addition, some breakfast cereals contain caffeine. Concentrations were estimated using standard compositions and reference values from the American and Canadian food composition databases. However, if cocoa powder or guarana extract was at the bottom of the list of ingredients, the caffeine concentration was considered as negligible.                                                                                                                                                                                                                                                                                    | Maybe            |
| <b>Meat, meat products and meat substitutes</b>                                                            | Do not contain caffeine.                                                                                                                                                                                                                                                                                                                                                                                                                                                                                                                                                                                                                                                                                                                                                                                      | No               |
| <b>Fish and seafood</b>                                                                                    | Do not contain caffeine.                                                                                                                                                                                                                                                                                                                                                                                                                                                                                                                                                                                                                                                                                                                                                                                      | No               |
| <b>Eggs</b>                                                                                                | Do not contain caffeine.                                                                                                                                                                                                                                                                                                                                                                                                                                                                                                                                                                                                                                                                                                                                                                                      | No               |
| <b>Fats and oils</b>                                                                                       | Do not contain caffeine.                                                                                                                                                                                                                                                                                                                                                                                                                                                                                                                                                                                                                                                                                                                                                                                      | No               |
| <b>Sugar, jam, honey, and syrups</b>                                                                       | Do not contain caffeine.                                                                                                                                                                                                                                                                                                                                                                                                                                                                                                                                                                                                                                                                                                                                                                                      | No               |
| <b>Chocolate (pure)</b>                                                                                    | Chocolate is a source of caffeine. The American and Canadian food composition databases served as the main references: chocolate milk (20 mg/100g), dark chocolate (70 mg/100g), chocolate (average milk chocolate and dark chocolate: 45 mg/100g), and white chocolate (0 mg/100g).                                                                                                                                                                                                                                                                                                                                                                                                                                                                                                                          | Yes              |
| <b>Confectionery, ice-cream, cream-based desserts, cakes and cookies</b>                                   | Some products may contain caffeine according to their flavour (chocolate, dark chocolate, milk chocolate, stracciatella, coffee/mocha). The American and Canadian food composition databases served as the main references and, when the food item was missing as a reference, we estimated caffeine concentration based on standard recipes and compositions: cocoa powder (150 mg/100g), chocolate powder (30 mg/100g), chocolate milk (20 mg/100g), dark chocolate (70 mg/100g), chocolate (45 mg/100g). If the quantity/proportion of chocolate contained in the foods was not available in the ingredient lists, we estimated it. Values for foods with coffee flavour were estimated from several unlisted references, as no information was found on the caffeine concentration in the coffee extract. | Maybe            |

| Food Group                                                    | Decision                                                                                                                                                                                                                                                                                                                                                                                                                                                                                                                                                                                                                                                                                                                                                                                                                                                                                                                                                                                                       | Contain caffeine |
|---------------------------------------------------------------|----------------------------------------------------------------------------------------------------------------------------------------------------------------------------------------------------------------------------------------------------------------------------------------------------------------------------------------------------------------------------------------------------------------------------------------------------------------------------------------------------------------------------------------------------------------------------------------------------------------------------------------------------------------------------------------------------------------------------------------------------------------------------------------------------------------------------------------------------------------------------------------------------------------------------------------------------------------------------------------------------------------|------------------|
| <b>Fruit and vegetable juices</b>                             | Do not contain caffeine.                                                                                                                                                                                                                                                                                                                                                                                                                                                                                                                                                                                                                                                                                                                                                                                                                                                                                                                                                                                       | No               |
| <b>Soft drinks</b>                                            | Cola-based soft drinks, energy drinks and iced teas contain caffeine. The concentration of caffeine in the Swiss regular Coca Cola® (7 mg/100g), Coca Cola Diet® (5.8 mg/100g), Coca Cola Zero® (7.8 mg/100g), Pepsi® (7.7 mg/100g) and Pepsi Max® (10 mg/100g), and iced teas (3.6 mg/100g) were measured. Red Bull® and Energy Drink® had both the concentration on the packaging (32 mg/100g). Other soft drinks (e.g., lemonades, fruit-based soft drinks) do not contain caffeine.                                                                                                                                                                                                                                                                                                                                                                                                                                                                                                                        | Maybe            |
| <b>Herbal and fruit tea</b>                                   | Do not contain caffeine.                                                                                                                                                                                                                                                                                                                                                                                                                                                                                                                                                                                                                                                                                                                                                                                                                                                                                                                                                                                       | No               |
| <b>Water</b>                                                  | Do not contain caffeine.                                                                                                                                                                                                                                                                                                                                                                                                                                                                                                                                                                                                                                                                                                                                                                                                                                                                                                                                                                                       | No               |
| <b>Tea and mate</b>                                           | Tea leaves and mate are sources of caffeine. Based on the American food composition database, a scientific article and other references (see table notes), the caffeine concentration was defined as follows: black tea (15 mg/100g), green tea (12 mg/100g), white tea (17 mg/100g), Jasmin tea (11 mg/100g), and mate (36 mg/100g).                                                                                                                                                                                                                                                                                                                                                                                                                                                                                                                                                                                                                                                                          | Yes              |
| <b>Coffee, coffee-based beverages, and coffee substitutes</b> | The caffeine concentration of 42 samples of ristrettos, espressos and lungos were analysed. The concentration of caffeine in "self-made" and "take-away/restaurant/vending machine" ristrettos was 254 and 268 mg/100g ("powder-based" (instant) ristrettos not measured). The concentration in "powder-based", "self-made" and "take-away/restaurant/vending machine" espressos was 39, 91 and 177 mg/100g, respectively. The concentration in "powder-based", "self-made" and "take-away/restaurant/vending machine" lungos was 41, 51 and 101 mg/100g, respectively. The average ristretto (259 mg/100g), espressos (120 mg/100g), and lungos (67 mg/100g), and were used as a reference to estimate coffee-based beverages (e.g., cappuccino, latte macchiato) using standard recipes. Based on the American food composition database, caffeine concentration in coffee substitutes were as follows: cereal coffee (0 mg/100g), chicory coffee (2 mg/100g), mix of coffee and chicory (e.g., 40 mg/100g). | Yes              |
| <b>Alcoholic drinks</b>                                       | Alcohol itself does not contain caffeine, but cocktails made with cola-based soft drinks contain caffeine. In this case, the proportion of cola in the cocktail was estimated.                                                                                                                                                                                                                                                                                                                                                                                                                                                                                                                                                                                                                                                                                                                                                                                                                                 | Maybe            |
| <b>Sauces and condiments</b>                                  | Do not contain caffeine.                                                                                                                                                                                                                                                                                                                                                                                                                                                                                                                                                                                                                                                                                                                                                                                                                                                                                                                                                                                       | No               |
| <b>Salty snacks, chips, crackers</b>                          | Do not contain caffeine.                                                                                                                                                                                                                                                                                                                                                                                                                                                                                                                                                                                                                                                                                                                                                                                                                                                                                                                                                                                       | No               |
| <b>Soups and broths</b>                                       | Do not contain caffeine.                                                                                                                                                                                                                                                                                                                                                                                                                                                                                                                                                                                                                                                                                                                                                                                                                                                                                                                                                                                       | No               |
| <b>Others</b>                                                 | Energy/sports and protein bars, and protein shakes may contain caffeine according to the ingredients and flavour. The American and Canadian food composition databases served as the main references and, when the food item was missing as a reference, we estimated caffeine concentration based on standard compositions.                                                                                                                                                                                                                                                                                                                                                                                                                                                                                                                                                                                                                                                                                   | Maybe            |

**American and Canadian food composition databases:** [www.ndb.nal.usda.gov](http://www.ndb.nal.usda.gov) and [www.food-nutrition.canada.ca](http://www.food-nutrition.canada.ca). **Other references:** Sereshti H, Samadi S. A rapid and simple determination of caffeine in teas, coffees and eight beverages. Food Chemistry. 2014 Sep;158:8–13, [www.caffeineinformer.com](http://www.caffeineinformer.com), [www.frc.ch/yaourt-a-la-cafeinel](http://www.frc.ch/yaourt-a-la-cafeinel). **Standard compositions:** [www.coopathome.ch](http://www.coopathome.ch), [www.produits.migros.ch](http://www.produits.migros.ch), [www.kinder.com](http://www.kinder.com), [www.ferrero.fr](http://www.ferrero.fr), [www.nu3.fr](http://www.nu3.fr), [www.ovomaltine.ch](http://www.ovomaltine.ch), [www.nestle-shop.ch](http://www.nestle-shop.ch), [www.merci.ch](http://www.merci.ch), [www.nestle-cereals.com](http://www.nestle-cereals.com), [www.i-dietetique.com](http://www.i-dietetique.com), [www.world-fr.openfoodfacts.org](http://www.world-fr.openfoodfacts.org), [www.leshop.ch](http://www.leshop.ch), [www.kelloggs.in](http://www.kelloggs.in), [www.das-ist-drin.de](http://www.das-ist-drin.de), [www.cailler.ch](http://www.cailler.ch), [www.lindt.ch](http://www.lindt.ch), [www.wikipedia.org](http://www.wikipedia.org), [www.storck.ch](http://www.storck.ch). **Standard recipes:** [www.swissmilk.ch](http://www.swissmilk.ch), [www.bettybossi.ch](http://www.bettybossi.ch), [www.cuisineaz.com](http://www.cuisineaz.com), [www.marmiton.org](http://www.marmiton.org), [www.750g.com](http://www.750g.com), [www.allrecipes.fr](http://www.allrecipes.fr), [www.fr.inshaker.com](http://www.fr.inshaker.com).

**Supplementary Table S2.** Measurements of caffeine concentration in coffee and soft drinks.

| Beverages              | Description                                  | Brands                                                              | Caffeine concentration (mg/100g) |
|------------------------|----------------------------------------------|---------------------------------------------------------------------|----------------------------------|
| Cola-based soft drinks |                                              | Pepsi®                                                              | 7.7                              |
|                        |                                              | Pepsi Max®                                                          | 10.0                             |
|                        |                                              | Coca Cola® (regular)                                                | 7.0                              |
|                        |                                              | Coca Cola Diet®                                                     | 5.8                              |
|                        |                                              | Coca Cola Zero®                                                     | 7.8                              |
| Iced teas              |                                              | Ice Tea® lemon (Migros®)                                            | 4.1                              |
|                        |                                              | Lipton® lemon                                                       | 3.1                              |
|                        |                                              | Nestea® lemon                                                       | 3.6                              |
|                        |                                              | <b>Mean of iced teas</b>                                            | <b>3.6</b>                       |
| Ristrettos             | Self-made                                    | Nespresso® ristretto 1                                              | 280.7                            |
|                        |                                              | Nespresso® ristretto 2                                              | 227.4                            |
|                        |                                              | <b>Mean of self-made ristrettos</b>                                 | <b>254.1</b>                     |
|                        | Take-away/<br>restaurant/<br>vending machine | University hospital canteen 1 (Ticino)                              | 227.5                            |
|                        |                                              | University hospital canteen 2 (Ticino)                              | 225.2                            |
|                        |                                              | Starbucks® 1                                                        | 406.2                            |
|                        |                                              | Starbucks® 2                                                        | 396.2                            |
|                        |                                              | Selecta® 1                                                          | 207.4                            |
|                        |                                              | Selecta® 2                                                          | 217.9                            |
|                        |                                              | Professional Nespresso® 1                                           | 223.8                            |
|                        |                                              | Professional Nespresso® 2                                           | 237.9                            |
|                        |                                              | <b>Mean of take-away ristrettos</b>                                 | <b>267.8</b>                     |
|                        |                                              | <b>Mean of ristrettos<br/>(2/3 "self-made" and 1/3 "take-away")</b> | <b>258.6</b>                     |
| Espressos              | Powder-based<br>(instant)                    | Instant Nescafé® Azera 1                                            | 40.0                             |
|                        |                                              | Instant Nescafé® Azera 2                                            | 37.2                             |
|                        |                                              | <b>Mean of powder-based espressos</b>                               | <b>38.6</b>                      |
|                        | Self-made                                    | Nespresso® Livanto 1                                                | 93.7                             |
|                        |                                              | Nespresso® Livanto 2                                                | 94.6                             |
|                        |                                              | Nespresso® Capriccio 1                                              | 102.4                            |
|                        |                                              | Nespresso® Capriccio 2                                              | 94.1                             |
|                        |                                              | Nespresso® Volluto 1                                                | 81.4                             |
|                        |                                              | Nespresso® Volluto 2                                                | 77.5                             |
|                        |                                              | <b>Mean of self-made espressos</b>                                  | <b>90.6</b>                      |
|                        | Take-away/<br>restaurant/<br>vending machine | University hospital canteen 1 (Ticino)                              | 147.3                            |
|                        |                                              | University hospital canteen 2 (Ticino)                              | 156.0                            |
|                        |                                              | Starbucks® 1                                                        | 246.3                            |
|                        |                                              | Starbucks® 2                                                        | 237.0                            |
|                        |                                              | Selecta® 1                                                          | 183.6                            |
|                        |                                              | Selecta® 2                                                          | 167.8                            |

|        |                                              |                                           |              |
|--------|----------------------------------------------|-------------------------------------------|--------------|
|        |                                              | Professional Nespresso® 1                 | 137.6        |
|        |                                              | Professional Nespresso® 2                 | 144.3        |
|        |                                              | <b>Mean of take-away espressos</b>        | <b>177.5</b> |
|        |                                              | <b>Mean of not powder-based espressos</b> | <b>119.6</b> |
|        |                                              | (2/3 "self-made" and 1/3 "take-away")     |              |
| Lungos | Powder-based (instant)                       | Instant Nescafé GOLD® 1                   | 40.9         |
|        |                                              | Instant Nescafé GOLD® 2                   | 40.1         |
|        |                                              | <b>Mean of powder-based lungos</b>        | <b>40.5</b>  |
|        | Self-made                                    | Nespresso® Envivo Lungo 1                 | 64.4         |
|        |                                              | Nespresso® Envivo Lungo 2                 | 53.9         |
|        |                                              | Nespresso® Fortissio Lungo 1              | 47.1         |
|        |                                              | Nespresso® Fortissio Lungo 2              | 55.5         |
|        |                                              | Nespresso® Vivalto Lungo 1                | 36.7         |
|        |                                              | Nespresso® Vivalto Lungo 2                | 45.2         |
|        |                                              | <b>Mean of self-made lungos</b>           | <b>50.5</b>  |
|        | Take-away/<br>restaurant/<br>vending machine | University hospital canteen 1 (Ticino)    | 99.6         |
|        |                                              | University hospital canteen 2 (Ticino)    | 98.1         |
|        |                                              | Starbucks® 1                              | 95.5         |
|        |                                              | Starbucks® 2                              | 138.7        |
|        |                                              | Selecta® 1                                | 119.4        |
|        |                                              | Selecta® 2                                | 108.1        |
|        |                                              | Professional Nespresso® 1                 | 72.4         |
|        |                                              | Professional Nespresso® 2                 | 75.5         |
|        |                                              | <b>Mean of take-away lungos</b>           | <b>100.9</b> |
|        |                                              | <b>Mean of not powder-based lungos</b>    | <b>67.3</b>  |
|        |                                              | (2/3 "self-made" and 1/3 "take-away")     |              |

**Supplementary Table S3.** Daily caffeine consumption per kg of body weight in the Swiss population (mg/kg/day) and percentage (%) of the population exceeding the recommendation of 5.7mg/kg/day.

| Population characteristics |                   | N     | Weighted<br>N | Weighted<br>% | Weighted<br>mean | SD   | Weighted<br>P5 | Weighted<br>P25 | Weighted<br>median | Weighted<br>P75 | Weighted<br>P95 | >5.7 mg/kg<br>% |
|----------------------------|-------------------|-------|---------------|---------------|------------------|------|----------------|-----------------|--------------------|-----------------|-----------------|-----------------|
| All                        | Entire population | 2 057 | 4 627 878     | 100%          | 2.66             | 1.78 | 0.39           | 1.34            | 2.41               | 3.56            | 5.80            | 5.6%            |
| Sex                        | Men               | 933   | 2 305 141     | 50%           | 2.66             | 1.76 | 0.42           | 1.37            | 2.43               | 3.54            | 5.60            | 4.5%            |
|                            | Women             | 1124  | 2 322 737     | 50%           | 2.67             | 1.80 | 0.38           | 1.34            | 2.41               | 3.60            | 5.92            | 6.8%            |
| Age group                  | 18-34 years       | 563   | 1 306 178     | 28%           | 2.00             | 1.51 | 0.26           | 0.83            | 1.71               | 2.91            | 4.99            | 2.3%            |
|                            | 35-49 years       | 602   | 1 421 756     | 31%           | 2.77             | 1.81 | 0.41           | 1.44            | 2.46               | 3.67            | 6.12            | 6.4%            |
|                            | 50-64 years       | 554   | 1 250 918     | 27%           | 3.15             | 1.87 | 0.70           | 1.84            | 2.85               | 4.07            | 6.67            | 8.2%            |
|                            | 65-75 years       | 338   | 649 026       | 14%           | 2.82             | 1.62 | 0.54           | 1.80            | 2.64               | 3.64            | 5.79            | 5.5%            |
| Language<br>region         | German-speaking   | 1 341 | 3 183 216     | 69%           | 2.83             | 1.87 | 0.38           | 1.42            | 2.56               | 3.81            | 6.27            | 7.1%            |
|                            | French-speaking   | 502   | 1 187 738     | 26%           | 2.39             | 1.53 | 0.41           | 1.22            | 2.20               | 3.11            | 5.37            | 2.7%            |
|                            | Italian-speaking  | 214   | 256 925       | 6%            | 1.93             | 1.23 | 0.37           | 0.99            | 1.75               | 2.73            | 4.02            | 0.6%            |
| Nationality                | Swiss             | 1 789 | 3 470 404     | 75%           | 2.66             | 1.78 | 0.39           | 1.41            | 2.42               | 3.55            | 5.79            | 5.5%            |
|                            | Not Swiss         | 265   | 1 145 199     | 25%           | 2.66             | 1.79 | 0.37           | 1.23            | 2.41               | 3.55            | 5.92            | 5.8%            |
| Education                  | Lower             | 286   | 620 712       | 13%           | 2.96             | 2.14 | 0.37           | 1.50            | 2.53               | 3.56            | 7.91            | 9.4%            |
|                            | Middle            | 771   | 1 589 873     | 34%           | 2.44             | 1.61 | 0.36           | 1.16            | 2.20               | 3.36            | 5.56            | 4.5%            |
|                            | Higher            | 997   | 2 405 018     | 52%           | 2.73             | 1.77 | 0.41           | 1.40            | 2.49               | 3.67            | 5.78            | 5.4%            |
| Income                     | Lower             | 486   | 1 128 723     | 24%           | 2.69             | 1.93 | 0.35           | 1.26            | 2.45               | 3.46            | 6.12            | 6.8%            |
|                            | Middle            | 516   | 1 095 517     | 24%           | 2.60             | 1.61 | 0.53           | 1.34            | 2.37               | 3.46            | 5.84            | 5.6%            |
|                            | Higher            | 802   | 1 831 768     | 40%           | 2.69             | 1.73 | 0.41           | 1.40            | 2.42               | 3.65            | 5.60            | 4.7%            |
|                            | No answer         | 250   | 559 595       | 12%           | 2.62             | 1.94 | 0.23           | 1.01            | 2.27               | 3.60            | 6.76            | 6.1%            |
| Smoking<br>status          | Never smoked      | 1 072 | 2 307 169     | 50%           | 2.43             | 1.70 | 0.31           | 1.05            | 2.19               | 3.38            | 5.37            | 3.6%            |
|                            | Ex-smokers        | 530   | 1 271 513     | 27%           | 2.70             | 1.60 | 0.49           | 1.57            | 2.45               | 3.55            | 5.79            | 5.8%            |
|                            | Smokers           | 451   | 1 034 578     | 22%           | 3.13             | 2.05 | 0.69           | 1.80            | 2.73               | 3.96            | 7.12            | 9.7%            |
| Weight status              | Normal weight     | 1'166 | 2'625'518     | 57%           | 2.77             | 1.91 | 0.36           | 1.34            | 2.46               | 3.74            | 6.01            | 7.1%            |
|                            | Overweight        | 629   | 1'422'231     | 31%           | 2.60             | 1.55 | 0.58           | 1.41            | 2.46               | 3.44            | 5.34            | 3.8%            |
|                            | Obesity           | 262   | 580'130       | 13%           | 2.36             | 1.62 | 0.38           | 1.13            | 2.07               | 3.23            | 5.37            | 3.6%            |

N: number. SD: standard deviation. P: percentile.

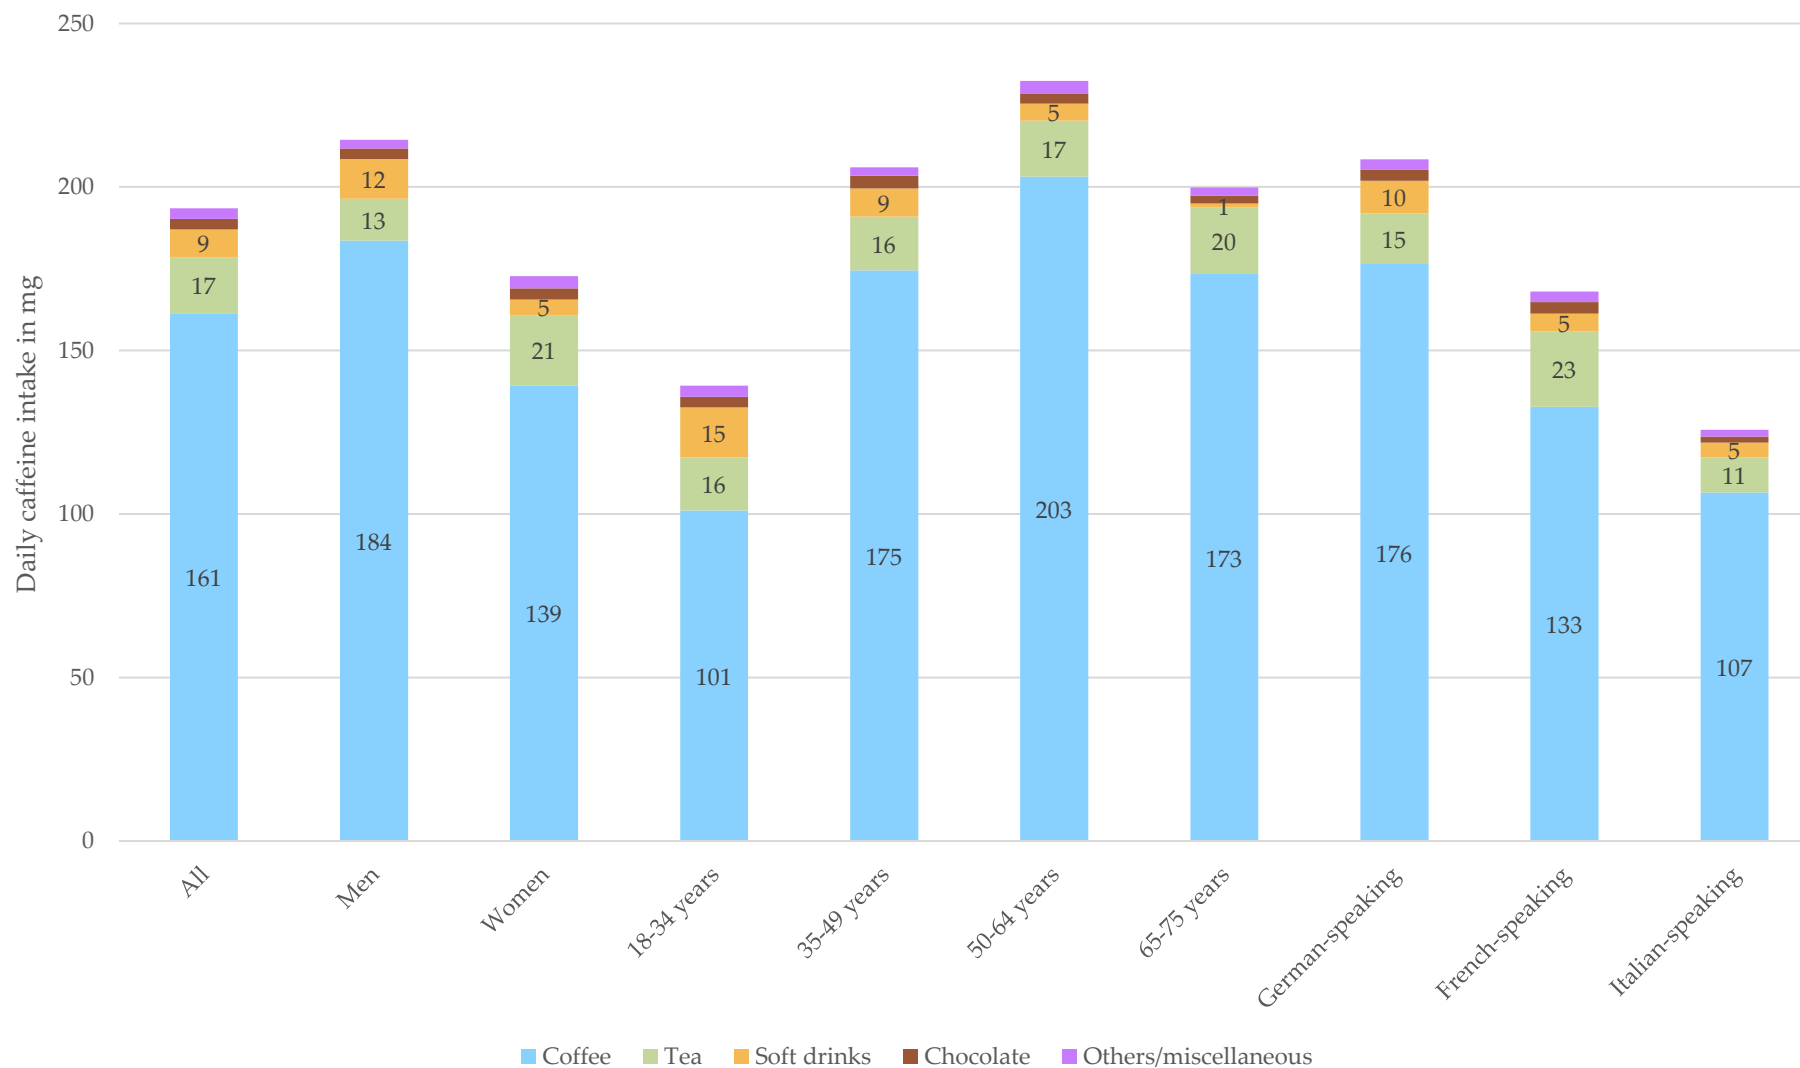

**Supplementary Figure S2.** Main food groups sources of caffeine (mg/day). *Labels on bars represent the intake of the specific food group.*



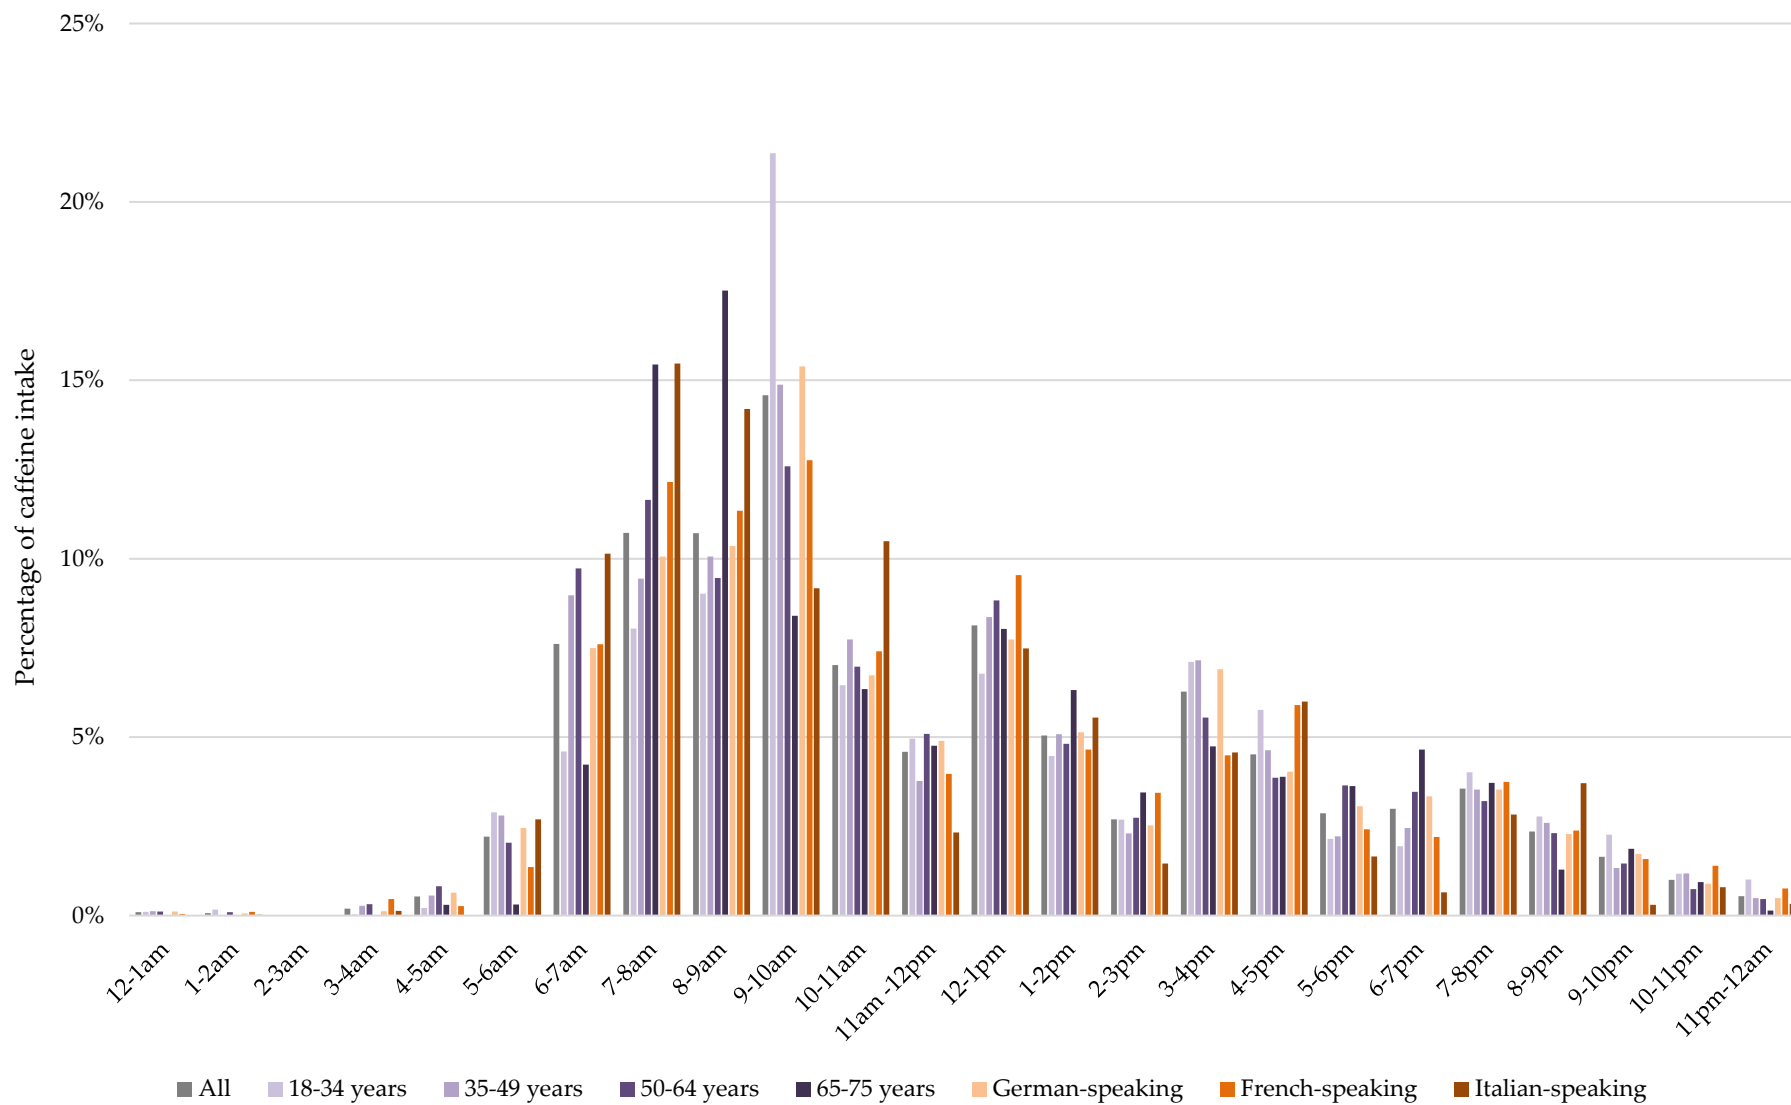

**Supplementary Figure S3.** Distribution of caffeine consumption per hour during the day (percentage/day).

**Supplementary Table S4.** Daily caffeine consumption in the Swiss population aged 18-64 years (mg/day) and percentage (%) of the population exceeding the recommendation of 400 mg.

| Population characteristics |                   | N     | Weighted<br>N | Weighted<br>% | Weighted<br>mean | Weighted<br>SD | Weighted<br>P5 | Weighted<br>P25 | Weighted<br>median | Weighted<br>P75 | Weighted<br>P95 | > 400mg<br>% |
|----------------------------|-------------------|-------|---------------|---------------|------------------|----------------|----------------|-----------------|--------------------|-----------------|-----------------|--------------|
| All                        | Entire population | 1 719 | 3 978 852     | 100%          | 190              | 132            | 28             | 92              | 166                | 259             | 428             | 6.9%         |
| Sex                        | Men               | 765   | 1 960 574     | 49%           | 211              | 142            | 32             | 104             | 187                | 284             | 445             | 9.1%         |
|                            | Women             | 954   | 2 018 277     | 51%           | 169              | 119            | 26             | 83              | 149                | 227             | 394             | 4.8%         |
| Language<br>region         | German-speaking   | 1 108 | 2 700 260     | 68%           | 202              | 139            | 28             | 99              | 176                | 275             | 451             | 8.2%         |
|                            | French-speaking   | 432   | 1 056 907     | 27%           | 170              | 115            | 29             | 86              | 147                | 232             | 400             | 4.9%         |
|                            | Italian-speaking  | 179   | 221 685       | 6%            | 134              | 86             | 22             | 70              | 119                | 189             | 281             | 0.3%         |
| Nationality                | Swiss             | 1 464 | 2 870 497     | 72%           | 189              | 131            | 28             | 96              | 168                | 257             | 419             | 6.1%         |
|                            | No Swiss          | 252   | 1 096 079     | 28%           | 191              | 135            | 31             | 83              | 163                | 266             | 445             | 9.0%         |
| Education                  | Lower             | 208   | 489 881       | 12%           | 208              | 163            | 31             | 106             | 174                | 269             | 556             | 9.2%         |
|                            | Middle            | 651   | 1 362 272     | 34%           | 172              | 121            | 25             | 78              | 155                | 238             | 408             | 5.4%         |
|                            | Higher            | 857   | 2 114 423     | 53%           | 196              | 130            | 28             | 99              | 172                | 268             | 428             | 7.3%         |
| Income                     | Lower             | 354   | 870 702       | 22%           | 188              | 140            | 29             | 85              | 163                | 250             | 481             | 7.3%         |
|                            | Middle            | 414   | 900 718       | 23%           | 184              | 123            | 34             | 96              | 164                | 237             | 399             | 4.8%         |
|                            | Higher            | 734   | 1 696 751     | 43%           | 194              | 128            | 28             | 98              | 173                | 266             | 416             | 6.4%         |
|                            | No answer         | 214   | 498 405       | 13%           | 186              | 147            | 15             | 65              | 151                | 267             | 449             | 11.7%        |
| Smoking<br>status          | Never smoker      | 907   | 1 994 752     | 50%           | 167              | 122            | 20             | 69              | 147                | 237             | 400             | 4.9%         |
|                            | Ex-smokers        | 400   | 1 020 402     | 26%           | 197              | 117            | 39             | 110             | 172                | 269             | 416             | 6.9%         |
|                            | Smokers           | 408   | 949 080       | 24%           | 229              | 155            | 46             | 131             | 199                | 285             | 519             | 10.8%        |
| Weight status              | Normal weight     | 1'022 | 2'342'545     | 59%           | 176              | 127            | 24             | 83              | 157                | 238             | 413             | 5.8%         |
|                            | Overweight        | 495   | 1'173'135     | 29%           | 206              | 129            | 43             | 105             | 185                | 275             | 430             | 6.9%         |
|                            | Obesity           | 202   | 463'172       | 12%           | 218              | 156            | 31             | 94              | 193                | 300             | 506             | 12.2%        |

N: number. SD: standard deviation. P: percentile.
